# Supplementary material for: A saccharinate-bridged palladacyclic dimer with a Pd–Pd bond: experimental and molecular docking studies of the interaction with DNA and BSA andin vitrocytotoxicity against human cancer cell lines
Source: Royal Society of Chemistry journal article supplement (doi:10.1039/c7nj03138f), 2017-11-28

Electronic Supplementary Material (ESI) for New Journal of Chemistry.  
This journal is © The Royal Society of Chemistry 2017

## Supplementary data

# A saccharinate-bridged palladacyclic dimer with Pd-Pd bond: experimental and molecular docking studies of the interaction with DNA and BSA and *in vitro* cytotoxicity activities against human cancer cell lines

Kazem Karami\*<sup>a</sup>, Moloud Alinaghi<sup>a</sup>, Zahra Amirghofran<sup>b</sup>, Janusz Lipkowski<sup>c</sup>, Amir Abbas Momtazi-borojeni<sup>d,e</sup>

<sup>a</sup>Department of Chemistry, Isfahan University of Technology, Isfahan, 84156/83111, Iran

<sup>b</sup>Immunology Department, Shiraz University of Medical Sciences, Shiraz 71454, Iran

<sup>c</sup>Institute of Physical Chemistry, Polish Academy of Sciences, Kasprzaka 44/52, 01-224 Warsaw, Poland

<sup>d</sup>Department of Medical Biotechnology, School of Medicine, Student Research Committee, Mashhad University of Medical Sciences, Mashhad, Iran

<sup>e</sup>Nanotechnology Research Center, Bu-Ali Research Institute, Mashhad University of Medical Sciences, Mashhad, Iran

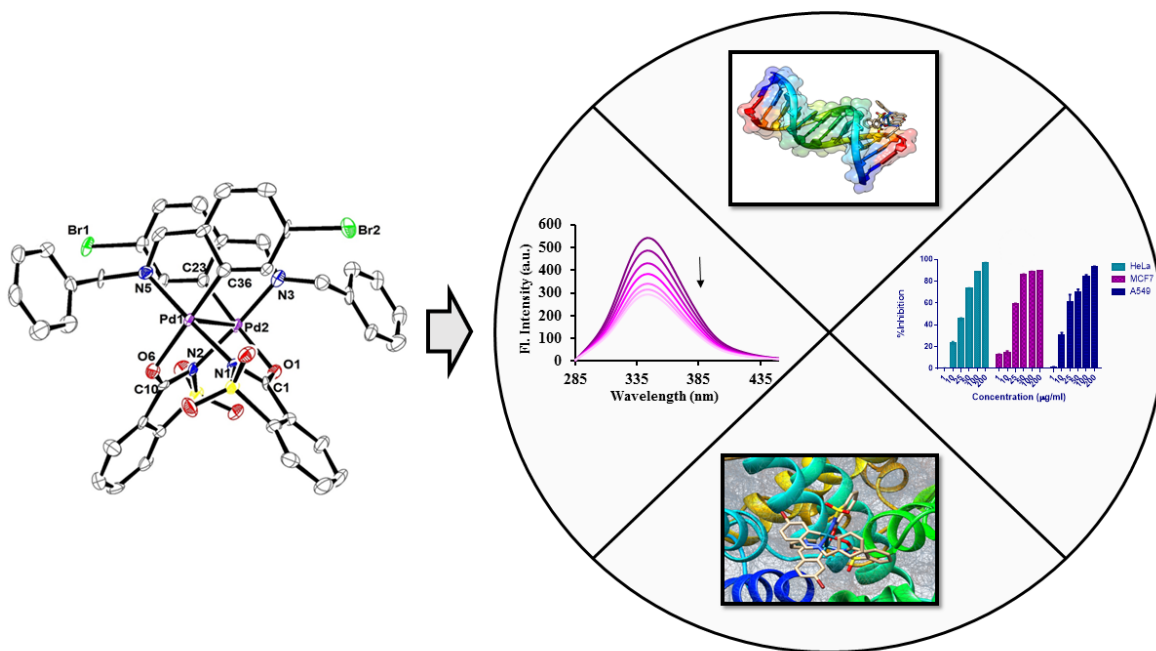

**Fig. S1:**  $^1\text{H}$  NMR spectra of ligand **LH** in  $\text{DMSO-}d_6$ .

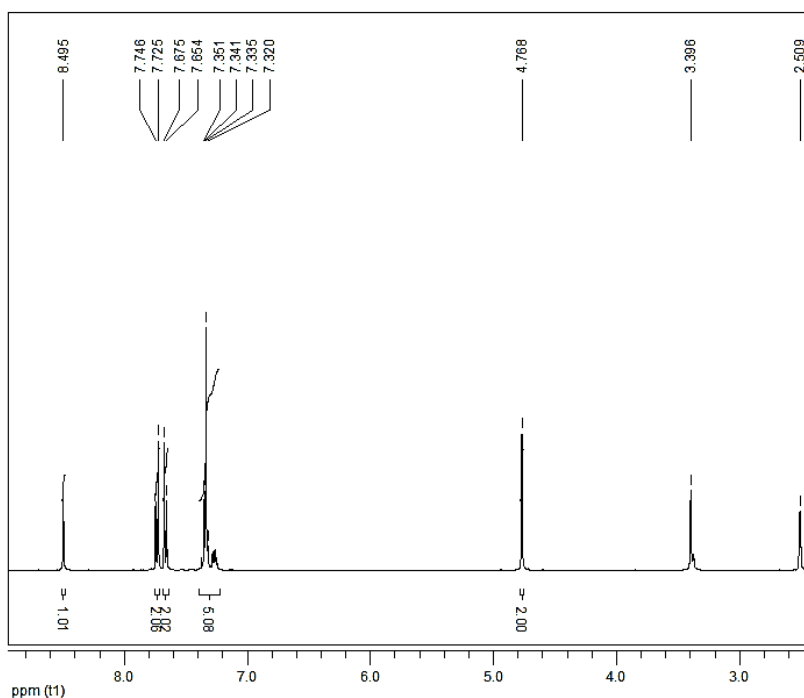

**Fig. S2:**  $^1\text{H}$  NMR spectra of complex **1** in  $\text{DMSO-}d_6$ .

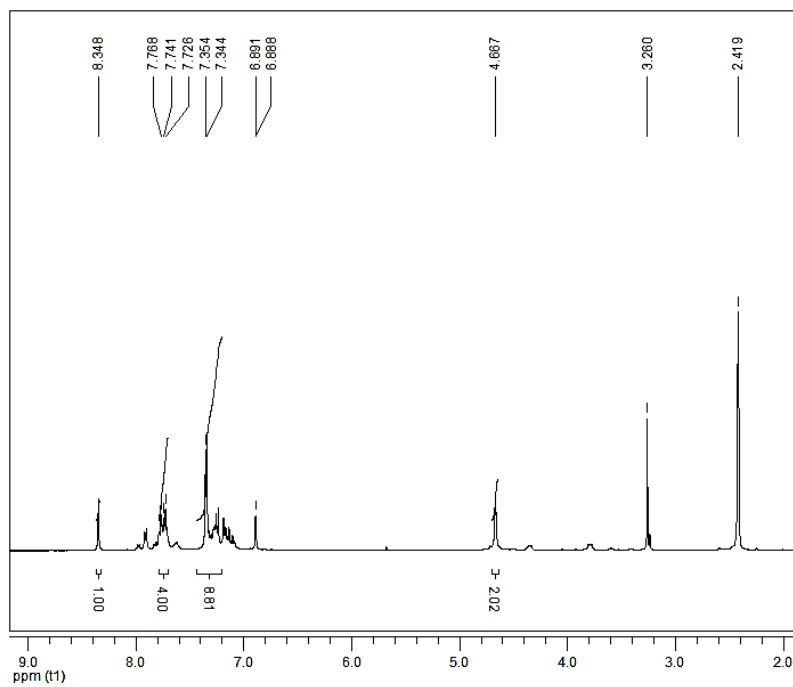

**Fig. S3:**  $^{13}\text{C}$   $\{^1\text{H}\}$  NMR spectra of ligand **LH** in  $\text{DMSO-}d_6$ .

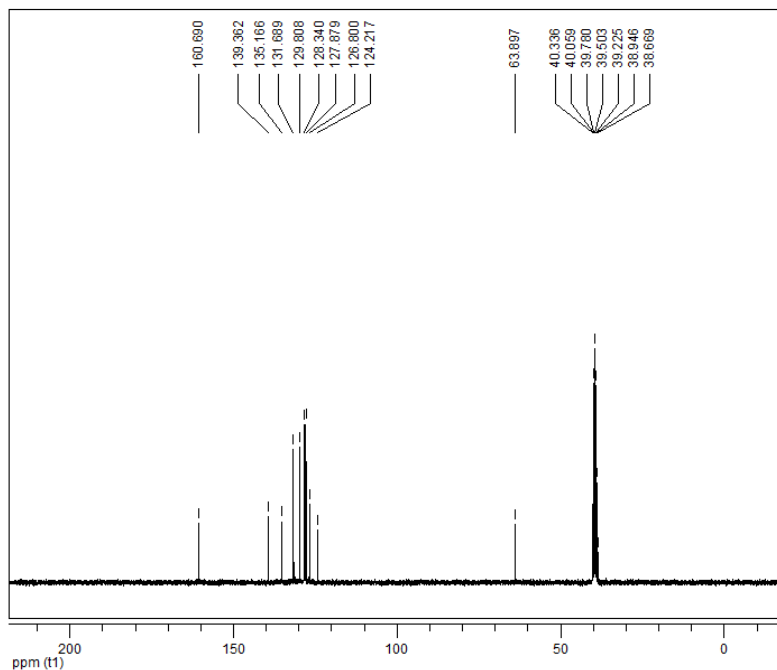

**Fig. S4:**  $^{13}\text{C}$   $\{^1\text{H}\}$  NMR spectra of complex **1** in  $\text{DMSO-}d_6$ .

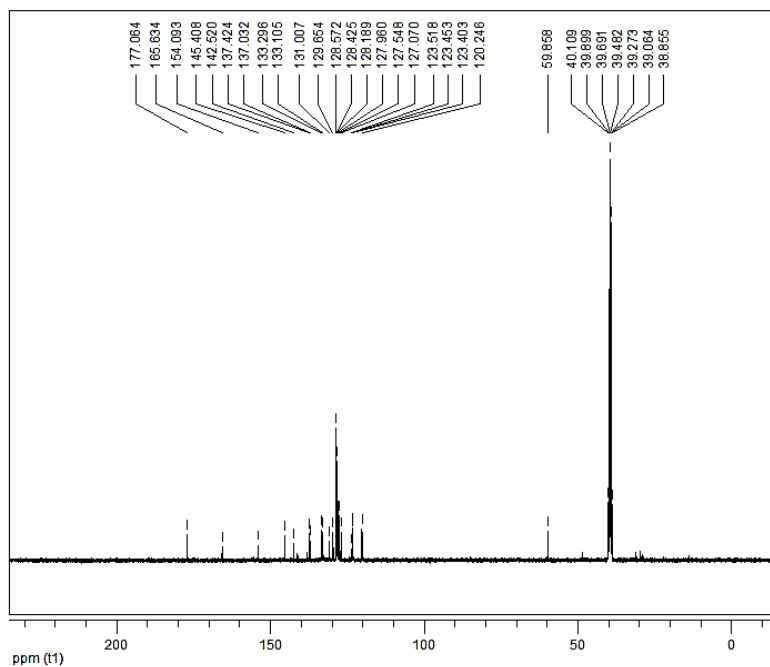

**Fig. S5:** *In vitro* cytotoxic activity of sodium saccharin (A), ligand **LH** (B) and complex **1** (C) against HeLa, A549 and MCF-7 tumor cell lines. Results are the mean  $\pm$  SD of three independent experiments.

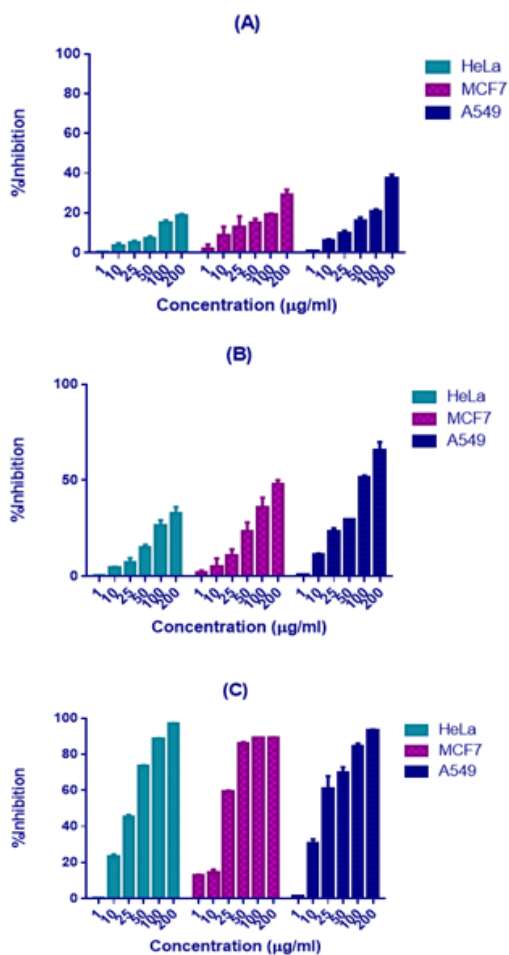

**Fig. S6:** *In vitro* cytotoxic activity of complex **1** against NIH normal fibroblast cells.

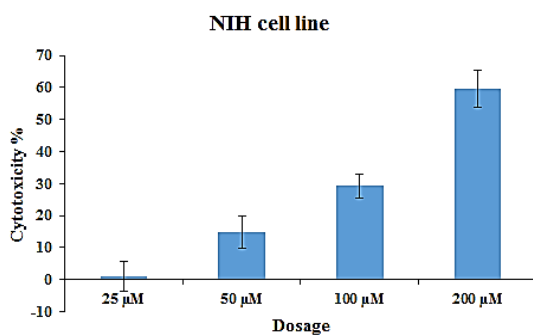

Supplement: c7nj03138f1.pdf [file c7nj03138f1.pdf]
